# Supplementary material for: Incorporating additive genetic effects and full LD information to discover genome-level gene-environment interactions with summary statistics of complex traits
Source: Research Square preprint supplement (doi:10.21203/rs.3.rs-4979809/v1), 2024-09-26
Supplement: Supplementary file 1 [file 31b46dc11828d8e44e3f5ccc.docx]

| method | Narrow-sense heritability | | Type-I error Rate |
| --- | --- | --- | --- |
| test only | 0.1 | 0.045 | |
| 0.2 | 0.048 | |
| 0.3 | 0.054 | |
| Average | 0.049 | |
| test only | 0.1 | 0.055 | |
| 0.2 | 0.051 | |
| 0.3 | 0.051 | |
| Average | 0.052 | |
| joint modeling test | 0.1 | 0.052 | |
| 0.2 | 0.050 | |
| 0.3 | 0.047 | |
| Average | 0.050 | |

Table 1: Type-I error Rate at 0.05 level for three LDER-GE-based methods to test , each scenario with 500 replications.
